# Supplementary material
Source: publisher figshare collection journal article supplement (https://acs.figshare.com/ndownloader/files/5738748)
Supplement: Supplementary file 1 [file 5738748]

_publ_section_title

;
>From 1D Chain to 3D Network: Tuning Hybrid II-VI Nanostructures and Their Optical Properties

;

_publ_requested_journal     'J. Amer. Chem. Soc.'

_publ_contact_author         'Li Jing'
_publ_contact_author_address

; Department of Chemistry and Chemical Biology,
Rutgers University,
Piscataway, NJ 08854, USA
;
_publ_contact_author_email     jingli@rutchem.rutgers.edu
_publ_contact_author_fax      '+1(732)445-5312'
_publ_contact_author_phone    '+1(732)445-2774'


loop_
_publ_author_name
_publ_author_address

 'Huang, Xiaoying'
; Department of Chemistry and Chemical Biology,
Rutgers University,
Piscataway, NJ 08854, USA
;
 'Li, Jing'
; Department of Chemistry and Chemical Biology,
Rutgers University,
Piscataway, NJ 08854, USA
; 
'Zhang, Yong'
; National Renewable Energy Laboratory, 
Golden, CO 80401, USA
;  

'Mascarenhas, Angelo'
; National Renewable Energy Laboratory, 
Golden, CO 80401, USA
;  
data_Compound 1_xh4-6g 
 
_audit_creation_method            SHELXL-97 
_chemical_name_systematic 
; 
 ? 
; 
_chemical_name_common             ? 
_chemical_melting_point           ? 
_chemical_formula_moiety          ZnTe(pda) 
_chemical_formula_sum 
 'C3 H10 N2 Te Zn' 
_chemical_formula_weight          267.10 
 
loop_ 
 _atom_type_symbol 
 _atom_type_description 
 _atom_type_scat_dispersion_real 
 _atom_type_scat_dispersion_imag 
 _atom_type_scat_source 
 'C'  'C'   0.0033   0.0016 
 'International Tables Vol C Tables 4.2.6.8 and 6.1.1.4' 
 'H'  'H'   0.0000   0.0000 
 'International Tables Vol C Tables 4.2.6.8 and 6.1.1.4' 
 'N'  'N'   0.0061   0.0033 
 'International Tables Vol C Tables 4.2.6.8 and 6.1.1.4' 
 'Zn'  'Zn'   0.2839   1.4301 
 'International Tables Vol C Tables 4.2.6.8 and 6.1.1.4' 
 'Te'  'Te'  -0.5308   1.6751 
 'International Tables Vol C Tables 4.2.6.8 and 6.1.1.4' 
 
_symmetry_cell_setting            Orthorhombic 
_symmetry_space_group_name_H-M    Pbcm 
 
loop_ 
 _symmetry_equiv_pos_as_xyz 
 'x, y, z' 
 '-x, -y, z+1/2' 
 '-x, y+1/2, -z+1/2' 
 'x, -y+1/2, -z' 
 '-x, -y, -z' 
 'x, y, -z-1/2' 
 'x, -y-1/2, z-1/2' 
 '-x, y-1/2, z' 
 
_cell_length_a                    9.997(2) 
_cell_length_b                    6.9970(10) 
_cell_length_c                    10.332(2) 
_cell_angle_alpha                 90.00 
_cell_angle_beta                  90.00 
_cell_angle_gamma                 90.00 
_cell_volume                      722.7(2) 
_cell_formula_units_Z             4 
_cell_measurement_temperature     293(2) 
_cell_measurement_reflns_used     20 
_cell_measurement_theta_min       6.11 
_cell_measurement_theta_max       12.83 
 
_exptl_crystal_description        columnar 
_exptl_crystal_colour             colorless 
_exptl_crystal_size_max           0.15 
_exptl_crystal_size_mid           0.06 
_exptl_crystal_size_min           0.015 
_exptl_crystal_density_meas       ? 
_exptl_crystal_density_diffrn     2.455 
_exptl_crystal_density_method     'not measured' 
_exptl_crystal_F_000              496 
_exptl_absorpt_coefficient_mu     7.250 
_exptl_absorpt_correction_type    psi scans 
_exptl_absorpt_correction_T_min   0.6599 
_exptl_absorpt_correction_T_max   1.000 
_exptl_absorpt_process_details    ? 
 
_exptl_special_details 
; 
 ? 
; 
 
_diffrn_ambient_temperature       293(2) 
_diffrn_radiation_wavelength      0.71073 
_diffrn_radiation_type            MoK\a 
_diffrn_radiation_source          'fine-focus sealed tube' 
_diffrn_radiation_monochromator   graphite 
_diffrn_measurement_device_type   Enraf-Nonius CAD4 
_diffrn_measurement_method        \w 
_diffrn_detector_area_resol_mean  ? 
_diffrn_standards_number          3 
_diffrn_standards_interval_count  300 
_diffrn_standards_interval_time   250 
_diffrn_standards_decay_%         +-6.0 
_diffrn_reflns_number             2092 
_diffrn_reflns_av_R_equivalents   0.0608 
_diffrn_reflns_av_sigmaI/netI     0.0722 
_diffrn_reflns_limit_h_min        0 
_diffrn_reflns_limit_h_max        14 
_diffrn_reflns_limit_k_min        0 
_diffrn_reflns_limit_k_max        9 
_diffrn_reflns_limit_l_min        -14 
_diffrn_reflns_limit_l_max        14 
_diffrn_reflns_theta_min          2.04 
_diffrn_reflns_theta_max          29.96 
_reflns_number_total              1107 
_reflns_number_gt                 709 
_reflns_threshold_expression      >2sigma(I) 
 
_computing_data_collection        CAD4/PC 
_computing_cell_refinement        CAD4/PC 
_computing_data_reduction         XCAD4/PC 
_computing_structure_solution     'SHELXS-97 (Sheldrick, 1990)' 
_computing_structure_refinement   'SHELXL-97 (Sheldrick, 1997)' 
_computing_molecular_graphics     Material Studio 
_computing_publication_material   Windows Wors2000 
                                                  
_refine_special_details 
; 
 Refinement of F^2^ against ALL reflections.  The weighted R-factor wR and 
 goodness of fit S are based on F^2^, conventional R-factors R are based 
 on F, with F set to zero for negative F^2^. The threshold expression of 
 F^2^ > 2sigma(F^2^) is used only for calculating R-factors(gt) etc. and is 
 not relevant to the choice of reflections for refinement.  R-factors based 
 on F^2^ are statistically about twice as large as those based on F, and R- 
 factors based on ALL data will be even larger. 
; 
 
_refine_ls_structure_factor_coef  Fsqd  
_refine_ls_matrix_type            full 
_refine_ls_weighting_scheme       calc  
_refine_ls_weighting_details 
 'calc w=1/[\s^2^(Fo^2^)+(0.0500P)^2^+0.0000P] where P=(Fo^2^+2Fc^2^)/3' 
_atom_sites_solution_primary      direct 
_atom_sites_solution_secondary    difmap 
_atom_sites_solution_hydrogens    geom 
_refine_ls_hydrogen_treatment     mixed 
_refine_ls_extinction_method      none 
_refine_ls_extinction_coef        ? 
_refine_ls_number_reflns          709
_refine_ls_number_parameters      37 
_refine_ls_number_restraints      0 
_refine_ls_R_factor_all           0.0968 
_refine_ls_R_factor_gt            0.0527 
_refine_ls_wR_factor_ref          0.1253 
_refine_ls_wR_factor_gt           0.1145 
_refine_ls_goodness_of_fit_ref    1.172 
_refine_ls_restrained_S_all       1.172 
_refine_ls_shift/su_max           0.000 
_refine_ls_shift/su_mean          0.000 
 
loop_ 
 _atom_site_label 
 _atom_site_type_symbol 
 _atom_site_fract_x 
 _atom_site_fract_y 
 _atom_site_fract_z 
 _atom_site_U_iso_or_equiv 
 _atom_site_adp_type 
 _atom_site_occupancy 
 _atom_site_symetry_multiplicity 
 _atom_site_calc_flag 
 _atom_site_refinement_flags 
 _atom_site_disorder_assembly 
 _atom_site_disorder_group 
Te1 Te -0.15000(7) 0.03878(12) 0.7500 0.0268(2) Uani 1 2 d S . . 
Zn2 Zn 0.08752(13) -0.1021(2) 0.7500 0.0255(3) Uani 1 2 d S . . 
C2 C 0.4040(13) 0.082(2) 0.7500 0.045(4) Uani 1 2 d S . . 
H2A H 0.5006 0.0684 0.7500 0.054 Uiso 1 2 calc SR . . 
H2B H 0.3849 0.2183 0.7500 0.054 Uiso 1 2 calc SR . . 
N N 0.2064(8) 0.0330(11) 0.6093(7) 0.0363(16) Uani 1 1 d . . . 
H0A H 0.1815 -0.0091 0.5306 0.044 Uiso 1 1 calc R . . 
H0B H 0.1906 0.1596 0.6121 0.044 Uiso 1 1 calc R . . 
C1 C 0.3518(9) 0.0002(14) 0.6254(12) 0.048(3) Uani 1 1 d . . . 
H1A H 0.3991 0.0578 0.5533 0.058 Uiso 1 1 calc R . . 
H1B H 0.3693 -0.1362 0.6237 0.058 Uiso 1 1 calc R . . 
 
loop_ 
 _atom_site_aniso_label 
 _atom_site_aniso_U_11 
 _atom_site_aniso_U_22 
 _atom_site_aniso_U_33 
 _atom_site_aniso_U_23 
 _atom_site_aniso_U_13 
 _atom_site_aniso_U_12 
Te1 0.0283(4) 0.0214(3) 0.0309(4) 0.000 0.000 -0.0005(3) 
Zn2 0.0291(7) 0.0229(6) 0.0244(7) 0.000 0.000 -0.0008(5) 
C2 0.026(6) 0.027(7) 0.083(12) 0.000 0.000 -0.003(5) 
N 0.052(4) 0.029(3) 0.028(3) 0.000(3) 0.008(3) -0.005(4) 
C1 0.042(5) 0.036(6) 0.067(7) 0.001(5) 0.026(5) -0.004(4) 
 
_geom_special_details 
; 
 All esds (except the esd in the dihedral angle between two l.s. planes) 
 are estimated using the full covariance matrix.  The cell esds are taken 
 into account individually in the estimation of esds in distances, angles 
 and torsion angles; correlations between esds in cell parameters are only 
 used when they are defined by crystal symmetry.  An approximate (isotropic) 
 treatment of cell esds is used for estimating esds involving l.s. planes. 
; 
 
loop_ 
 _geom_bond_atom_site_label_1 
 _geom_bond_atom_site_label_2 
 _geom_bond_distance 
 _geom_bond_site_symmetry_2 
 _geom_bond_publ_flag 
Te1 Zn2 2.5711(16) . ? 
Te1 Zn2 2.5890(17) 3_556 ? 
Zn2 N 2.102(7) 6_557 ? 
Zn2 N 2.102(7) . ? 
Zn2 Te1 2.5890(17) 3_546 ? 
C2 C1 1.504(14) 6_557 ? 
C2 C1 1.504(14) . ? 
C2 H2A 0.9700 . ? 
C2 H2B 0.9700 . ? 
N C1 1.481(11) . ? 
N H0A 0.9000 . ? 
N H0B 0.9000 . ? 
C1 H1A 0.9700 . ? 
C1 H1B 0.9700 . ? 
 
loop_ 
 _geom_angle_atom_site_label_1 
 _geom_angle_atom_site_label_2 
 _geom_angle_atom_site_label_3 
 _geom_angle 
 _geom_angle_site_symmetry_1 
 _geom_angle_site_symmetry_3 
 _geom_angle_publ_flag 
Zn2 Te1 Zn2 98.59(4) . 3_556 ? 
N Zn2 N 87.5(4) 6_557 . ? 
N Zn2 Te1 110.4(2) 6_557 . ? 
N Zn2 Te1 110.4(2) . . ? 
N Zn2 Te1 107.5(2) 6_557 3_546 ? 
N Zn2 Te1 107.5(2) . 3_546 ? 
Te1 Zn2 Te1 126.51(6) . 3_546 ? 
C1 C2 C1 117.8(11) 6_557 . ? 
C1 C2 H2A 107.9 6_557 . ? 
C1 C2 H2A 107.9 . . ? 
C1 C2 H2B 107.9 6_557 . ? 
C1 C2 H2B 107.9 . . ? 
H2A C2 H2B 107.2 . . ? 
C1 N Zn2 114.0(6) . . ? 
C1 N H0A 108.7 . . ? 
Zn2 N H0A 108.7 . . ? 
C1 N H0B 108.7 . . ? 
Zn2 N H0B 108.7 . . ? 
H0A N H0B 107.6 . . ? 
N C1 C2 112.2(9) . . ? 
N C1 H1A 109.2 . . ? 
C2 C1 H1A 109.2 . . ? 
N C1 H1B 109.2 . . ? 
C2 C1 H1B 109.2 . . ? 
H1A C1 H1B 107.9 . . ? 
 
_diffrn_measured_fraction_theta_max    1.000 
_diffrn_reflns_theta_full              29.96 
_diffrn_measured_fraction_theta_full   1.000 
_refine_diff_density_max    1.948 
_refine_diff_density_min   -2.349 
_refine_diff_density_rms    0.299 

#=== The End

 
data_compound 2_xh4-12c 
 
_audit_creation_method            SHELXL-97 
_chemical_name_systematic 
; 
 ? 
; 
_chemical_name_common             ? 
_chemical_melting_point           ? 
_chemical_formula_moiety          ZnTe(N2H4) 
_chemical_formula_sum 
 'H4 N2 Te Zn' 
_chemical_formula_weight          225.02 
 
loop_ 
 _atom_type_symbol 
 _atom_type_description 
 _atom_type_scat_dispersion_real 
 _atom_type_scat_dispersion_imag 
 _atom_type_scat_source 
 'H'  'H'   0.0000   0.0000 
 'International Tables Vol C Tables 4.2.6.8 and 6.1.1.4' 
 'N'  'N'   0.0061   0.0033 
 'International Tables Vol C Tables 4.2.6.8 and 6.1.1.4' 
 'Zn'  'Zn'   0.2839   1.4301 
 'International Tables Vol C Tables 4.2.6.8 and 6.1.1.4' 
 'Te'  'Te'  -0.5308   1.6751 
 'International Tables Vol C Tables 4.2.6.8 and 6.1.1.4' 
 
_symmetry_cell_setting            Monoclinic 
_symmetry_space_group_name_H-M    P2(1) 
 
loop_ 
 _symmetry_equiv_pos_as_xyz 
 'x, y, z' 
 '-x, y+1/2, -z' 
 
_cell_length_a                    4.2222(6) 
_cell_length_b                    6.9057(9) 
_cell_length_c                    7.3031(10) 
_cell_angle_alpha                 90.00 
_cell_angle_beta                  98.928(3) 
_cell_angle_gamma                 90.00 
_cell_volume                      210.36(5) 
_cell_formula_units_Z             2 
_cell_measurement_temperature     293(2) 
_cell_measurement_reflns_used     20 
_cell_measurement_theta_min       6.81 
_cell_measurement_theta_max       11.35
 
_exptl_crystal_description        columnar 
_exptl_crystal_colour             colorless 
_exptl_crystal_size_max           0.12 
_exptl_crystal_size_mid           0.02 
_exptl_crystal_size_min           0.02 
_exptl_crystal_density_meas       ? 
_exptl_crystal_density_diffrn     3.553 
_exptl_crystal_density_method     'not measured' 
_exptl_crystal_F_000              200 
_exptl_absorpt_coefficient_mu     12.419 
_exptl_absorpt_correction_type    ? 
_exptl_absorpt_correction_T_min   0.419 
_exptl_absorpt_correction_T_max   1.000 
_exptl_absorpt_process_details    ? 
 
_exptl_special_details 
; 
 ? 
; 
 
_diffrn_ambient_temperature       293(2) 
_diffrn_radiation_wavelength      0.71073 
_diffrn_radiation_type            MoK\a 
_diffrn_radiation_source          'fine-focus sealed tube' 
_diffrn_radiation_monochromator   graphite 
_diffrn_measurement_device_type   Enraf-Nonius CAD4 
_diffrn_measurement_method        \w 
_diffrn_detector_area_resol_mean  ? 
_diffrn_standards_number          3 
_diffrn_standards_interval_count  300 
_diffrn_standards_interval_time   250
_diffrn_standards_decay_%         +-4.0 
_diffrn_reflns_number             1568 
_diffrn_reflns_av_R_equivalents   0.0207 
_diffrn_reflns_av_sigmaI/netI     0.0465 
_diffrn_reflns_limit_h_min        -5 
_diffrn_reflns_limit_h_max        6 
_diffrn_reflns_limit_k_min        -9 
_diffrn_reflns_limit_k_max        8 
_diffrn_reflns_limit_l_min        -10 
_diffrn_reflns_limit_l_max        10 
_diffrn_reflns_theta_min          2.82 
_diffrn_reflns_theta_max          30.52 
_reflns_number_total              1110 
_reflns_number_gt                 1070 
_reflns_threshold_expression      >2sigma(I) 
 
_computing_data_collection        CAD4/PC 
_computing_cell_refinement        CAD4/PC 
_computing_data_reduction         XCAD4/PC 
_computing_structure_solution     'SHELXS-97 (Sheldrick, 1990)' 
_computing_structure_refinement   'SHELXL-97 (Sheldrick, 1997)' 
_computing_molecular_graphics     Material Studio 
_computing_publication_material   Windows Word2000 
 
_refine_special_details 
; 
 Refinement of F^2^ against ALL reflections.  The weighted R-factor wR and 
 goodness of fit S are based on F^2^, conventional R-factors R are based 
 on F, with F set to zero for negative F^2^. The threshold expression of 
 F^2^ > 2sigma(F^2^) is used only for calculating R-factors(gt) etc. and is 
 not relevant to the choice of reflections for refinement.  R-factors based 
 on F^2^ are statistically about twice as large as those based on F, and R- 
 factors based on ALL data will be even larger. 
; 
 
_refine_ls_structure_factor_coef  Fsqd  
_refine_ls_matrix_type            full 
_refine_ls_weighting_scheme       calc  
_refine_ls_weighting_details 
 'calc w=1/[\s^2^(Fo^2^)+(0.0300P)^2^+6.0000P] where P=(Fo^2^+2Fc^2^)/3' 
_atom_sites_solution_primary      direct 
_atom_sites_solution_secondary    difmap 
_atom_sites_solution_hydrogens    geom 
_refine_ls_hydrogen_treatment     mixed 
_refine_ls_extinction_method      SHELXL 
_refine_ls_extinction_coef        0.003(2) 
_refine_ls_extinction_expression 
 'Fc^*^=kFc[1+0.001xFc^2^\l^3^/sin(2\q)]^-1/4^' 
_refine_ls_abs_structure_details 
 'Flack H D (1983), Acta Cryst. A39, 876-881' 
_refine_ls_abs_structure_Flack    0.08(8) 
_refine_ls_number_reflns          1070 
_refine_ls_number_parameters      40 
_refine_ls_number_restraints      1 
_refine_ls_R_factor_all           0.0473 
_refine_ls_R_factor_gt            0.0461 
_refine_ls_wR_factor_ref          0.1110 
_refine_ls_wR_factor_gt           0.1105 
_refine_ls_goodness_of_fit_ref    1.081 
_refine_ls_restrained_S_all       1.081 
_refine_ls_shift/su_max           0.000 
_refine_ls_shift/su_mean          0.000 
 
loop_ 
 _atom_site_label 
 _atom_site_type_symbol 
 _atom_site_fract_x 
 _atom_site_fract_y 
 _atom_site_fract_z 
 _atom_site_U_iso_or_equiv 
 _atom_site_adp_type 
 _atom_site_occupancy 
 _atom_site_symetry_multiplicity 
 _atom_site_calc_flag 
 _atom_site_refinement_flags 
 _atom_site_disorder_assembly 
 _atom_site_disorder_group 
Zn Zn 0.7668(3) -0.0445(3) 0.5505(2) 0.0206(3) Uani 1 1 d . . . 
Te Te 0.78305(16) 0.3284(3) 0.62736(10) 0.0185(2) Uani 1 1 d . . . 
N1 N 0.831(2) -0.164(3) 0.8168(14) 0.026(2) Uani 1 1 d . . . 
H1A H 0.8142 -0.2939 0.8068 0.031 Uiso 1 1 calc R . . 
H1B H 1.0315 -0.1372 0.8731 0.031 Uiso 1 1 calc R . . 
N2 N 0.606(4) -0.096(2) 0.9323(17) 0.037(3) Uani 1 1 d . . . 
H2A H 0.6020 0.0404 0.9186 0.00(3) Uiso 1 1 d R . . 
H2B H 0.7532 -0.1185 1.0581 0.05(6) Uiso 1 1 d R . . 
 
loop_ 
 _atom_site_aniso_label 
 _atom_site_aniso_U_11 
 _atom_site_aniso_U_22 
 _atom_site_aniso_U_33 
 _atom_site_aniso_U_23 
 _atom_site_aniso_U_13 
 _atom_site_aniso_U_12 
Zn 0.0209(7) 0.0184(7) 0.0227(7) 0.0003(6) 0.0044(5) 0.0000(5) 
Te 0.0178(3) 0.0152(3) 0.0226(3) 0.0001(4) 0.0037(2) -0.0004(4) 
N1 0.030(5) 0.020(5) 0.028(5) 0.003(7) 0.000(4) -0.002(7) 
N2 0.042(8) 0.046(9) 0.023(6) -0.003(5) 0.008(5) -0.003(6) 
 
_geom_special_details 
; 
 All esds (except the esd in the dihedral angle between two l.s. planes) 
 are estimated using the full covariance matrix.  The cell esds are taken 
 into account individually in the estimation of esds in distances, angles 
 and torsion angles; correlations between esds in cell parameters are only 
 used when they are defined by crystal symmetry.  An approximate (isotropic) 
 treatment of cell esds is used for estimating esds involving l.s. planes. 
; 
 
loop_ 
 _geom_bond_atom_site_label_1 
 _geom_bond_atom_site_label_2 
 _geom_bond_distance 
 _geom_bond_site_symmetry_2 
 _geom_bond_publ_flag 
Zn N1 2.092(12) . ? 
Zn Te 2.6145(16) 2_746 ? 
Zn Te 2.6289(17) 2_646 ? 
Zn Te 2.6345(18) . ? 
Te Zn 2.6145(16) 2_756 ? 
Te Zn 2.6289(17) 2_656 ? 
N1 N2 1.446(18) . ? 
 
loop_ 
 _geom_angle_atom_site_label_1 
 _geom_angle_atom_site_label_2 
 _geom_angle_atom_site_label_3 
 _geom_angle 
 _geom_angle_site_symmetry_1 
 _geom_angle_site_symmetry_3 
 _geom_angle_publ_flag 
N1 Zn Te 109.2(4) . 2_746 ? 
N1 Zn Te 107.8(4) . 2_646 ? 
Te Zn Te 107.27(6) 2_746 2_646 ? 
N1 Zn Te 101.1(5) . . ? 
Te Zn Te 115.91(6) 2_746 . ? 
Te Zn Te 115.04(6) 2_646 . ? 
Zn Te Zn 107.27(6) 2_756 2_656 ? 
Zn Te Zn 102.66(4) 2_756 . ? 
Zn Te Zn 103.25(4) 2_656 . ? 
N2 N1 Zn 114.2(10) . . ? 
 
_diffrn_measured_fraction_theta_max    0.958 
_diffrn_reflns_theta_full              30.52 
_diffrn_measured_fraction_theta_full   0.958 
_refine_diff_density_max    6.691 
_refine_diff_density_min   -1.131 
_refine_diff_density_rms    0.394 

#===The End

 
data_compound3_xh4-33b 
 
_audit_creation_method            SHELXL-97 
_chemical_name_systematic 
; 
 ? 
; 
_chemical_name_common             ? 
_chemical_melting_point           ? 
_chemical_formula_moiety          ZnTe(MeNH2) 
_chemical_formula_sum 
 'C H5 N Te Zn' 
_chemical_formula_weight          224.03 
 
loop_ 
 _atom_type_symbol 
 _atom_type_description 
 _atom_type_scat_dispersion_real 
 _atom_type_scat_dispersion_imag 
 _atom_type_scat_source 
 'C'  'C'   0.0033   0.0016 
 'International Tables Vol C Tables 4.2.6.8 and 6.1.1.4' 
 'H'  'H'   0.0000   0.0000 
 'International Tables Vol C Tables 4.2.6.8 and 6.1.1.4' 
 'N'  'N'   0.0061   0.0033 
 'International Tables Vol C Tables 4.2.6.8 and 6.1.1.4' 
 'Zn'  'Zn'   0.2839   1.4301 
 'International Tables Vol C Tables 4.2.6.8 and 6.1.1.4' 
 'Te'  'Te'  -0.5308   1.6751 
 'International Tables Vol C Tables 4.2.6.8 and 6.1.1.4' 
 
_symmetry_cell_setting            orthorhombic 
_symmetry_space_group_name_H-M    Pbca 
 
loop_ 
 _symmetry_equiv_pos_as_xyz 
 'x, y, z' 
 '-x+1/2, -y, z+1/2' 
 '-x, y+1/2, -z+1/2' 
 'x+1/2, -y+1/2, -z' 
 '-x, -y, -z' 
 'x-1/2, y, -z-1/2' 
 'x, -y-1/2, z-1/2' 
 '-x-1/2, y-1/2, z' 
 
_cell_length_a                    7.1790(10) 
_cell_length_b                    6.9460(10) 
_cell_length_c                    18.913(4) 
_cell_angle_alpha                 90.00 
_cell_angle_beta                  90.00 
_cell_angle_gamma                 90.00 
_cell_volume                      943.1(3) 
_cell_formula_units_Z             8 
_cell_measurement_temperature     293(2) 
_cell_measurement_reflns_used     25 
_cell_measurement_theta_min       7.96 
_cell_measurement_theta_max       11.83 
 
_exptl_crystal_description        columnar 
_exptl_crystal_colour             grayish 
_exptl_crystal_size_max           0.30 
_exptl_crystal_size_mid           0.04 
_exptl_crystal_size_min           0.002 
_exptl_crystal_density_meas       ? 
_exptl_crystal_density_diffrn     3.156 
_exptl_crystal_density_method     'not measured' 
_exptl_crystal_F_000              800 
_exptl_absorpt_coefficient_mu     11.073 
_exptl_absorpt_correction_type    psi-scan 
_exptl_absorpt_correction_T_min   0.629 
_exptl_absorpt_correction_T_max   1.000 
_exptl_absorpt_process_details    ? 
 
_exptl_special_details 
; 
 ? 
; 
 
_diffrn_ambient_temperature       293(2) 
_diffrn_radiation_wavelength      0.71073 
_diffrn_radiation_type            MoK\a 
_diffrn_radiation_source          'fine-focus sealed tube' 
_diffrn_radiation_monochromator   graphite 
_diffrn_measurement_device_type   Enraf-Nonius CAD4 
_diffrn_measurement_method        \w 
_diffrn_detector_area_resol_mean  ? 
_diffrn_standards_number          3 
_diffrn_standards_interval_count  300 
_diffrn_standards_interval_time   60 
_diffrn_standards_decay_%         +-3.0 
_diffrn_reflns_number             2725 
_diffrn_reflns_av_R_equivalents   0.0285 
_diffrn_reflns_av_sigmaI/netI     0.0345 
_diffrn_reflns_limit_h_min        0 
_diffrn_reflns_limit_h_max        10 
_diffrn_reflns_limit_k_min        0 
_diffrn_reflns_limit_k_max        9 
_diffrn_reflns_limit_l_min        -26 
_diffrn_reflns_limit_l_max        26 
_diffrn_reflns_theta_min          2.15 
_diffrn_reflns_theta_max          29.97 
_reflns_number_total              1364 
_reflns_number_gt                 1075 
_reflns_threshold_expression      >2sigma(I) 
 
_computing_data_collection        CAD4/PC 
_computing_cell_refinement        CAD4/PC 
_computing_data_reduction         XCAD4/PC 
_computing_structure_solution     'SHELXS-97 (Sheldrick, 1990)' 
_computing_structure_refinement   'SHELXL-97 (Sheldrick, 1997)' 
_computing_molecular_graphics     Material Studio 
_computing_publication_material   Windows Word2000 
 
_refine_special_details 
; 
 Refinement of F^2^ against ALL reflections.  The weighted R-factor wR and 
 goodness of fit S are based on F^2^, conventional R-factors R are based 
 on F, with F set to zero for negative F^2^. The threshold expression of 
 F^2^ > 2sigma(F^2^) is used only for calculating R-factors(gt) etc. and is 
 not relevant to the choice of reflections for refinement.  R-factors based 
 on F^2^ are statistically about twice as large as those based on F, and R- 
 factors based on ALL data will be even larger. 
; 
 
_refine_ls_structure_factor_coef  Fsqd  
_refine_ls_matrix_type            full 
_refine_ls_weighting_scheme       calc  
_refine_ls_weighting_details 
 'calc w=1/[\s^2^(Fo^2^)+(0.0750P)^2^+0.5000P] where P=(Fo^2^+2Fc^2^)/3' 
_atom_sites_solution_primary      direct 
_atom_sites_solution_secondary    difmap 
_atom_sites_solution_hydrogens    geom 
_refine_ls_hydrogen_treatment     mixed 
_refine_ls_extinction_method      SHELXL 
_refine_ls_extinction_coef        0.0011(3) 
_refine_ls_extinction_expression 
 'Fc^*^=kFc[1+0.001xFc^2^\l^3^/sin(2\q)]^-1/4^' 
_refine_ls_number_reflns          1075 
_refine_ls_number_parameters      38 
_refine_ls_number_restraints      0 
_refine_ls_R_factor_all           0.0585 
_refine_ls_R_factor_gt            0.0447 
_refine_ls_wR_factor_ref          0.1221 
_refine_ls_wR_factor_gt           0.1141 
_refine_ls_goodness_of_fit_ref    1.070 
_refine_ls_restrained_S_all       1.070 
_refine_ls_shift/su_max           0.001 
_refine_ls_shift/su_mean          0.000 
 
loop_ 
 _atom_site_label 
 _atom_site_type_symbol 
 _atom_site_fract_x 
 _atom_site_fract_y 
 _atom_site_fract_z 
 _atom_site_U_iso_or_equiv 
 _atom_site_adp_type 
 _atom_site_occupancy 
 _atom_site_symetry_multiplicity 
 _atom_site_calc_flag 
 _atom_site_refinement_flags 
 _atom_site_disorder_assembly 
 _atom_site_disorder_group 
Zn Zn 0.40658(10) 0.18304(10) 0.79651(4) 0.0220(2) Uani 1 1 d . . . 
Te Te 0.56464(5) 0.30911(5) 0.67955(2) 0.02015(18) Uani 1 1 d . . . 
N N 0.5618(7) 0.3120(8) 0.8766(3) 0.0282(13) Uani 1 1 d . . . 
H1 H 0.6830 0.2909 0.8672 0.034 Uiso 1 1 calc R . . 
H2 H 0.5432 0.4399 0.8738 0.034 Uiso 1 1 calc R . . 
C C 0.529(2) 0.255(2) 0.9484(5) 0.070(3) Uani 1 1 d . . . 
H3 H 0.6098 0.3258 0.9793 0.104 Uiso 1 1 calc R . . 
H4 H 0.5525 0.1197 0.9534 0.104 Uiso 1 1 calc R . . 
H5 H 0.4014 0.2814 0.9607 0.104 Uiso 1 1 calc R . . 
 
loop_ 
 _atom_site_aniso_label 
 _atom_site_aniso_U_11 
 _atom_site_aniso_U_22 
 _atom_site_aniso_U_33 
 _atom_site_aniso_U_23 
 _atom_site_aniso_U_13 
 _atom_site_aniso_U_12 
Zn 0.0189(3) 0.0174(4) 0.0298(4) 0.0007(3) -0.0005(3) 0.0003(2) 
Te 0.0159(2) 0.0150(3) 0.0295(3) -0.00004(14) 0.00022(12) -0.00012(12) 
N 0.024(3) 0.028(3) 0.033(3) -0.002(2) -0.003(2) -0.002(2) 
C 0.095(9) 0.085(8) 0.029(4) 0.003(5) -0.008(5) -0.017(7) 
 
_geom_special_details 
; 
 All esds (except the esd in the dihedral angle between two l.s. planes) 
 are estimated using the full covariance matrix.  The cell esds are taken 
 into account individually in the estimation of esds in distances, angles 
 and torsion angles; correlations between esds in cell parameters are only 
 used when they are defined by crystal symmetry.  An approximate (isotropic) 
 treatment of cell esds is used for estimating esds involving l.s. planes. 
; 
 
loop_ 
 _geom_bond_atom_site_label_1 
 _geom_bond_atom_site_label_2 
 _geom_bond_distance 
 _geom_bond_site_symmetry_2 
 _geom_bond_publ_flag 
Zn N 2.083(6) . ? 
Zn Te 2.6358(10) . ? 
Zn Te 2.6446(9) 3_646 ? 
Zn Te 2.6454(8) 6_557 ? 
Te Zn 2.6446(9) 3_656 ? 
Te Zn 2.6454(9) 6_657 ? 
N C 1.435(11) . ? 
N H1 0.9000 . ? 
N H2 0.9000 . ? 
C H3 0.9600 . ? 
C H4 0.9600 . ? 
C H5 0.9600 . ? 
 
loop_ 
 _geom_angle_atom_site_label_1 
 _geom_angle_atom_site_label_2 
 _geom_angle_atom_site_label_3 
 _geom_angle 
 _geom_angle_site_symmetry_1 
 _geom_angle_site_symmetry_3 
 _geom_angle_publ_flag 
N Zn Te 103.72(17) . . ? 
N Zn Te 104.84(16) . 3_646 ? 
Te Zn Te 115.87(3) . 3_646 ? 
N Zn Te 103.27(16) . 6_557 ? 
Te Zn Te 115.67(3) . 6_557 ? 
Te Zn Te 111.61(3) 3_646 6_557 ? 
Zn Te Zn 102.49(2) . 3_656 ? 
Zn Te Zn 98.39(2) . 6_657 ? 
Zn Te Zn 102.90(2) 3_656 6_657 ? 
C N Zn 118.8(6) . . ? 
C N H1 107.6 . . ? 
Zn N H1 107.6 . . ? 
C N H2 107.6 . . ? 
Zn N H2 107.6 . . ? 
H1 N H2 107.1 . . ? 
N C H3 109.5 . . ? 
N C H4 109.5 . . ? 
H3 C H4 109.5 . . ? 
N C H5 109.5 . . ? 
H3 C H5 109.5 . . ? 
H4 C H5 109.5 . . ? 
 
_diffrn_measured_fraction_theta_max    0.999 
_diffrn_reflns_theta_full              29.97 
_diffrn_measured_fraction_theta_full   0.999 
_refine_diff_density_max    5.722 
_refine_diff_density_min   -1.303 
_refine_diff_density_rms    0.314 

#===The End

data_compound 4_XH3-30G

_pd_block_id
  2002-11-14T02:04|XH3-30G-100|xh3-30g|rigaku

_audit_creation_method  "from EXP file using GSAS2CIF"
_audit_creation_date                   2002-11-14T02:04
_audit_author_name                     xh3-30g
_audit_update_record
; 2002-11-14T02:04  Initial CIF as created by GSAS2CIF
;

_refine_special_details
; ?
;
_pd_proc_ls_special_details
; ?
;

# if regions of the data are excluded, the reason(s) are supplied here:
_pd_proc_info_excluded_regions
; ?
;


# The following items are used to identify the programs used.
_computing_molecular_graphics     ?
_computing_publication_material   ?

_refine_ls_weighting_scheme       ?
_refine_ls_weighting_details      ?
_refine_ls_hydrogen_treatment     ?
_refine_ls_extinction_method      ?
_refine_ls_extinction_coef        ?
_refine_ls_number_constraints     ?

_refine_ls_restrained_S_all       ?
_refine_ls_restrained_S_obs       ?

_refine_ls_shift/su_max                19.00
_refine_ls_shift/su_mean               0.21
_computing_structure_refinement        GSAS
_refine_ls_number_parameters           91
_refine_ls_goodness_of_fit_all         0.94
_refine_ls_number_restraints           0
_refine_ls_matrix_type                 full

_pd_phase_name                         CdSe(en)1/2
_cell_length_a                         7.09494(33)
_cell_length_b                         6.79535(32)
_cell_length_c                         16.7212(8)
_cell_angle_alpha                      90.0
_cell_angle_beta                       90.0
_cell_angle_gamma                      90.0
_cell_volume                           806.17145
_symmetry_cell_setting                 orthorhombic
_symmetry_space_group_name_H-M         Pbca
loop_ _symmetry_equiv_pos_site_id _symmetry_equiv_pos_as_xyz
       1 +x,+y,+z 
       2 -x+1/2,+y+1/2,+z 
       3 +x,-y+1/2,+z+1/2 
       4 -x+1/2,-y,+z+1/2 
      -1 -x,-y,-z 
      -2 +x+1/2,-y+1/2,-z 
      -3 -x,+y+1/2,-z+1/2 
      -4 +x+1/2,+y,-z+1/2 

loop_
      _atom_site_type_symbol
      _atom_site_label
      _atom_site_fract_x
      _atom_site_fract_y
      _atom_site_fract_z
      _atom_site_occupancy
      _atom_site_thermal_displace_type
      _atom_site_U_iso_or_equiv
      _atom_site_symmetry_multiplicity
CD      
cd      0.60048(16)  0.05133(17)  0.30071(7)   1.0        Uani   0.01552       8
SE      
se      0.94657(23) -0.07510(31)  0.33200(8)   1.0        Uani   0.01473       8
N       
n       0.4047(17)  -0.1023(21)   0.3993(5)    1.0        Uiso   0.023(4)      8
C       
c       0.4051(16)  -0.0032(22)   0.4820(7)    1.0        Uiso   0.031(4)      8
H       
H1      0.44228     -0.22794      0.40521      1.0        Uiso   0.027         8
H       
H2      0.28547     -0.10447      0.3092       1.0        Uiso   0.027         8
H       
H3      0.32183     -0.07391      0.51693      1.0        Uiso   0.037         8
H       
H4      0.35785      0.12854      0.47682      1.0        Uiso   0.037         8

loop_ _atom_site_aniso_label
      _atom_site_aniso_U_11
      _atom_site_aniso_U_12
      _atom_site_aniso_U_13
      _atom_site_aniso_U_22
      _atom_site_aniso_U_23
      _atom_site_aniso_U_33
cd      0.0059(11)   0.0015(9)    0.0000(6)    0.0187(11)  -0.0002(7)    0.0220(8)  
se      0.0061(15)  -0.0090(14)   0.0003(9)    0.0204(18)  -0.0019(11)   0.0177(11) 
 
_chemical_formula_sum                  "C H4 Cd N Se"
_chemical_formula_weight               221.41
_cell_formula_units_Z                  8

loop_
      _geom_bond_atom_site_label_1
      _geom_bond_atom_site_label_2
      _geom_bond_distance
      _geom_bond_site_symmetry_1
      _geom_bond_site_symmetry_2
      _geom_bond_publ_flag
  cd        se              2.6536(22)  .      1_555  N
  cd        se              2.6133(25)  .      2_655  N
  cd        se              2.6182(16)  .     -4_556  N
  cd        n                2.396(10)  .      1_555  N
  cd        H2              2.4771(11)  .      1_555  N
  cd        H2              2.4943(12)  .     -4_656  N
  se        cd              2.6536(22)  .      1_555  N
  se        cd              2.6133(25)  .      2_645  N
  se        cd              2.6182(16)  .     -4_656  N
  se        H2              2.4427(16)  .      1_655  N
  n         cd               2.396(10)  .      1_555  N
  n         c                1.537(15)  .      1_555  N
  n         H1               0.900(14)  .      1_555  N
  n         H2               1.728(10)  .      1_555  N
  c         n                1.537(15)  .      1_555  N
  c         c                1.476(21)  .     -1_656  N
  c         H1               2.012(14)  .      1_555  N
  c         H3               0.960(14)  .      1_555  N
  c         H3               2.007(12)  .     -1_656  N
  c         H4               0.960(15)  .      1_555  N
  c         H4               2.007(11)  .     -1_656  N
  H1        n                0.900(14)  .      1_555  N
  H1        c                2.012(14)  .      1_555  N
  H2        cd              2.4771(11)  .      1_555  N
  H2        cd              2.4943(12)  .     -4_556  N
  H2        se              2.4427(16)  .      1_455  N
  H2        n                1.728(10)  .      1_555  N
  H3        c                0.960(14)  .      1_555  N
  H3        c                2.007(12)  .     -1_656  N
  H3        H4              1.55169(6)  .      1_555  N
  H4        c                0.960(15)  .      1_555  N
  H4        c                2.007(11)  .     -1_656  N
  H4        H3              1.55169(6)  .      1_555  N

loop_
      _geom_angle_atom_site_label_1
      _geom_angle_atom_site_label_2
      _geom_angle_atom_site_label_3
      _geom_angle
      _geom_angle_site_symmetry_1
      _geom_angle_site_symmetry_2
      _geom_angle_site_symmetry_3
      _geom_angle_publ_flag
  se        cd        se               113.16(7)      1_555  .      2_655  N
  se        cd        se               116.54(8)      1_555  .     -4_556  N
  se        cd        n               105.06(30)      1_555  .      1_555  N
  se        cd        se               115.80(8)      2_655  .     -4_556  N
  se        cd        n               102.20(34)      2_655  .      1_555  N
  se        cd        n               101.45(28)     -4_556  .      1_555  N
  cd        se        cd                99.02(6)      1_555  .      2_645  N
  cd        se        cd                96.46(7)      1_555  .     -4_656  N
  cd        se        cd               101.67(6)      2_645  .     -4_656  N
  cd        n         c                 115.3(9)      1_555  .      1_555  N
  cd        n         H1                108.5(8)      1_555  .      1_555  N
  c         n         H1               108.5(10)      1_555  .      1_555  N
  n         c         c                112.5(15)      1_555  .     -1_656  N
  n         c         H3               109.1(11)      1_555  .      1_555  N
  n         c         H4               109.1(11)      1_555  .      1_555  N
  c         c         H3               109.1(14)     -1_656  .      1_555  N
  c         c         H4               109.1(16)     -1_656  .      1_555  N
  H3        c         H4               107.8(13)      1_555  .      1_555  N
  c         H3        H4                 36.1(9)      1_555  .      1_555  N
  c         H4        H3                 36.1(8)      1_555  .      1_555  N

loop_ _atom_type_symbol
      _atom_type_number_in_cell
      _atom_type_scat_dispersion_real
      _atom_type_scat_dispersion_imag
      _atom_type_scat_Cromer_Mann_a1
      _atom_type_scat_Cromer_Mann_a2
      _atom_type_scat_Cromer_Mann_a3
      _atom_type_scat_Cromer_Mann_a4
      _atom_type_scat_Cromer_Mann_b1
      _atom_type_scat_Cromer_Mann_b2
      _atom_type_scat_Cromer_Mann_b3
      _atom_type_scat_Cromer_Mann_b4
      _atom_type_scat_Cromer_Mann_c
      _atom_type_scat_source
  CD         8.0   -0.079    4.653
 19.2214 0.59460 17.6444 6.90890 4.46100 24.7008 1.60290 87.4825 5.06940 
  International_Tables_Vol_C
  SE         8.0   -0.879    1.139
 17.0006 2.40980 5.81960 0.27260 3.97310 15.2372 4.35430 43.8163 2.84090 
  International_Tables_Vol_C
  N          8.0    0.029    0.018
 12.2126 0.00570 3.13220 9.89330 2.01250 28.9975 1.16630 0.58260 -11.529 
  International_Tables_Vol_C
  C          8.0    0.017    0.009
 2.31000 20.8439 1.02000 10.2075 1.58860 0.56870 0.86500 51.6512 0.21560 
  International_Tables_Vol_C
  H         32.0    0.000    0.000
 0.49300 10.5109 0.32291 26.1257 0.14019 3.14236 0.04081 57.7997 0.00304 
  International_Tables_Vol_C
_diffrn_radiation_probe                x-ray
_diffrn_radiation_polarisn_ratio       0.5

loop_
      _diffrn_radiation_wavelength
      _diffrn_radiation_wavelength_wt
      _diffrn_radiation_type
      _diffrn_radiation_wavelength_id
                      1.540500      1.000   K\a~1~  1
                      1.544300      0.500   K\a~2~  2
_pd_proc_ls_prof_R_factor              0.0475
_pd_proc_ls_prof_wR_factor             0.0643
_pd_proc_ls_prof_wR_expected           0.0690
_refine_ls_R_Fsqd_factor               0.09648

_pd_proc_ls_background_function
;   GSAS Background function number 2 with  8 terms.
 Cosine Fourier series
      1:   -8402.97     2:    15749.1     3:   -12644.4     4:    8702.52    
      5:   -5005.03     6:    2340.67     7:   -813.019     8:    183.874    
;

_exptl_absorpt_process_details
;   GSAS Absorption/surface roughness correction: function number 0
 No correction is applied.
;
_exptl_absorpt_correction_T_min        1.00000
_exptl_absorpt_correction_T_max        1.00000
# Extinction correction
_gsas_exptl_extinct_corr_T_min         1.00000
_gsas_exptl_extinct_corr_T_max         1.00000
_pd_proc_ls_pref_orient_corr
;   Spherical Harmonic ODF
 Spherical harmonic order= 16
 The sample symmetry is: cylindrical (fiber texture)
 Index =  2  0  0   Coeff=   -1.6238
 Index =  2  0  2   Coeff=    0.0152
 Index =  4  0  0   Coeff=    1.2645
 Index =  4  0  2   Coeff=    0.3246
 Index =  4  0  4   Coeff=    0.0887
 Index =  6  0  0   Coeff=   -0.7740
 Index =  6  0  2   Coeff=   -0.1023
 Index =  6  0  4   Coeff=    0.0336
 Index =  6  0  6   Coeff=   -0.0324
 Index =  8  0  0   Coeff=    0.7855
 Index =  8  0  2   Coeff=    0.5062
 Index =  8  0  4   Coeff=   -0.0079
 Index =  8  0  6   Coeff=   -0.0733
 Index =  8  0  8   Coeff=   -0.0836
 Index = 10  0  0   Coeff=   -0.3748
 Index = 10  0  2   Coeff=   -0.1555
 Index = 10  0  4   Coeff=   -0.0117
 Index = 10  0  6   Coeff=   -0.0185
 Index = 10  0  8   Coeff=    0.1335
 Index = 10  0 10   Coeff=   -0.3100
 Index = 12  0  0   Coeff=    0.5138
 Index = 12  0  2   Coeff=    0.2708
 Index = 12  0  4   Coeff=    0.3411
 Index = 12  0  6   Coeff=   -0.3499
 Index = 12  0  8   Coeff=   -0.0359
 Index = 12  0 10   Coeff=   -0.3823
 Index = 12  0 12   Coeff=   -0.1782
 Index = 14  0  0   Coeff=   -0.2702
 Index = 14  0  2   Coeff=    0.3281
 Index = 14  0  4   Coeff=    0.4066
 Index = 14  0  6   Coeff=    0.5248
 Index = 14  0  8   Coeff=    0.0442
 Index = 14  0 10   Coeff=   -0.1076
 Index = 14  0 12   Coeff=   -0.3579
 Index = 14  0 14   Coeff=   -0.4778
 Index = 16  0  0   Coeff=    0.6051
 Index = 16  0  2   Coeff=    0.1098
 Index = 16  0  4   Coeff=   -0.4793
 Index = 16  0  6   Coeff=    0.0326
 Index = 16  0  8   Coeff=   -0.0238
 Index = 16  0 10   Coeff=   -0.2120
 Index = 16  0 12   Coeff=   -0.3338
 Index = 16  0 14   Coeff=   -0.0321
 Index = 16  0 16   Coeff=   -0.3872
 Prefered orientation correction range: Min=   0.58693, Max=   3.12569
;

_pd_proc_ls_profile_function
;
 CW Profile function number 2 with  18 terms
 Profile coefficients for Simpson's rule integration of pseudovoigt function
 C.J. Howard (1982). J. Appl. Cryst.,15,615-620.
 P. Thompson, D.E. Cox & J.B. Hastings (1987). J. Appl. Cryst.,20,79-83.
 #1(GU)   =    2.000 #2(GV)   =   -2.000 #3(GW)   =    5.000
 #4(LX)   =    3.483 #5(LY)   =   24.355 #6(trns) =   -3.841
 #7(asym) =   7.1199 #8(shft) =  -8.5895 #9(GP)   =    0.000
 #10(stec)=    -3.99 #11(ptec)=     3.65 #12(sfec)=     0.00
 #13(L11) =    0.000 #14(L22) =    0.000 #15(L33) =    0.000
 #16(L12) =    0.000 #17(L13) =    0.000 #18(L23) =    0.000
 Peak tails are ignored  where the intensity is below 0.0050 times the peak
   Aniso. broadening axis   0.0   0.0   1.0
;
_pd_proc_ls_peak_cutoff 0.00500
_pd_proc_info_datetime                 2002-11-14T02:04:58
_pd_calc_method                        "Rietveld Refinement"

_pd_meas_2theta_range_min              8.0
_pd_meas_2theta_range_max              99.99
_pd_meas_2theta_range_inc              0.01
_pd_proc_2theta_range_min              8.0
_pd_proc_2theta_range_max              99.99
_pd_proc_2theta_range_inc              0.01

_pd_meas_number_of_points              9200
_pd_proc_number_of_points              9200

_reflns_number_observed                824
_reflns_limit_h_min                    0
_reflns_limit_h_max                    7
_reflns_limit_k_min                    0
_reflns_limit_k_max                    6
_reflns_limit_l_min                    0
_reflns_limit_l_max                    16
_reflns_d_resolution_high              1.010
_reflns_d_resolution_low               5.410

#===The end

data_compound 5_XH3-30F

_pd_block_id
  2002-11-14T01:51|XH3-30F-100|xh3-30f|Rigaku_D_M-2200T

_audit_creation_method  "from EXP file using GSAS2CIF"
_audit_creation_date                   2002-11-14T01:51
_audit_author_name                     xh3-30f
_audit_update_record
; 2002-11-14T01:51  Initial CIF as created by GSAS2CIF
;

_computing_molecular_graphics     ?
_computing_publication_material   ?

_refine_ls_weighting_scheme       ?
_refine_ls_weighting_details      ?
_refine_ls_hydrogen_treatment     ?
_refine_ls_extinction_method      ?
_refine_ls_extinction_coef        ?
_refine_ls_number_constraints     ?

_refine_ls_restrained_S_all       ?
_refine_ls_restrained_S_obs       ?

_refine_ls_shift/su_max                29.27
_refine_ls_shift/su_mean               0.31
_computing_structure_refinement        GSAS
_refine_ls_number_parameters           94
_refine_ls_goodness_of_fit_all         1.25
_refine_ls_number_restraints           0
_refine_ls_matrix_type                 full

_pd_phase_name                         "XH3-30F CdSe(pda)1/2"
_cell_length_a                         20.6660(12)
_cell_length_b                         6.8900(4)
_cell_length_c                         6.7513(4)
_cell_angle_alpha                      90.0
_cell_angle_beta                       90.0
_cell_angle_gamma                      90.0
_cell_volume                           961.31012
_symmetry_cell_setting                 orthorhombic
_symmetry_space_group_name_H-M         Cmc21
loop_ _symmetry_equiv_pos_site_id _symmetry_equiv_pos_as_xyz
       1 +x,+y,+z 
       2 -x,+y,+z 
       3 +x,-y,+z+1/2 
       4 -x,-y,+z+1/2 
     101 +x+1/2,+y+1/2,+z 
     102 -x+1/2,+y+1/2,+z 
     103 +x+1/2,-y+1/2,+z+1/2 
     104 -x+1/2,-y+1/2,+z+1/2 

loop_
      _atom_site_type_symbol
      _atom_site_label
      _atom_site_fract_x
      _atom_site_fract_y
      _atom_site_fract_z
      _atom_site_occupancy
      _atom_site_thermal_displace_type
      _atom_site_U_iso_or_equiv
      _atom_site_symmetry_multiplicity
CD      
CD      0.20998(8)   0.14845(32)  0.444(15)    1.0        Uani   0.0149        8
SE      
SE      0.18097(13)  0.2056(4)    0.070(15)    1.0        Uani   0.01025       8
N       
N       0.1252(8)    0.3142(33)   0.598(15)    1.0        Uiso   0.029(7)      8
C       
C1      0.0614(9)    0.2476(27)   0.521(16)    1.0        Uiso   0.024(8)      8
C       
C2      0.0          0.324(4)     0.616(17)    1.0        Uiso   0.026(9)      4
H       
H1      0.12959      0.44243      0.57675      1.0        Uiso   0.035         8
H       
H2      0.12697      0.29366      0.72983      1.0        Uiso   0.035         8
H       
H3      0.06048      0.10864      0.52989      1.0        Uiso   0.029         8
H       
H4      0.05979      0.27984      0.38242      1.0        Uiso   0.029         8
H       
H5      0.0          0.46336      0.60808      1.0        Uiso   0.031         4
H       
H6      0.0          0.28936      0.75368      1.0        Uiso   0.031         4

loop_ _atom_site_aniso_label
      _atom_site_aniso_U_11
      _atom_site_aniso_U_12
      _atom_site_aniso_U_13
      _atom_site_aniso_U_22
      _atom_site_aniso_U_23
      _atom_site_aniso_U_33
CD      0.0129(16)  -0.0022(11)  -0.0004(14)   0.0179(18)   0.0040(18)   0.0139(17) 
SE      0.0085(20)   0.0022(14)   0.0026(17)   0.0092(24)   0.0014(22)   0.0131(25) 
 
_chemical_formula_sum                  "C3 H10 Cd2 N2 Se2"
_chemical_formula_weight               456.85
_cell_formula_units_Z                  4

loop_
      _geom_bond_atom_site_label_1
      _geom_bond_atom_site_label_2
      _geom_bond_distance
      _geom_bond_site_symmetry_1
      _geom_bond_site_symmetry_2
      _geom_bond_publ_flag
  CD        SE                2.626(4)  .      1_555  N
  CD        SE              2.6519(33)  .      3_555  N
  CD        SE              2.6101(26)  .    104_555  N
  CD        N                2.335(18)  .      1_555  N
  SE        CD                2.626(4)  .      1_555  N
  SE        CD              2.6519(33)  .      3_554  N
  SE        CD              2.6101(26)  .    104_554  N
  N         CD               2.335(18)  .      1_555  N
  N         C1               1.491(29)  .      1_555  N
  N         H1               0.900(28)  .      1_555  N
  N         H2                0.90(10)  .      1_555  N
  N         H3               2.003(31)  .      1_555  N
  N         H4                 2.00(8)  .      1_555  N
  C1        N                1.491(29)  .      1_555  N
  C1        C2               1.518(27)  .      1_555  N
  C1        H1               1.982(30)  .      1_555  N
  C1        H2                 1.98(8)  .      1_555  N
  C1        H3               0.960(19)  .      1_555  N
  C1        H4                0.96(10)  .      1_555  N
  C1        H5                 2.04(4)  .      1_555  N
  C1        H6                 2.04(8)  .      1_555  N
  C2        C1               1.518(27)  .      1_555  N
  C2        C1               1.518(27)  .      2_555  N
  C2        H3                 2.03(4)  .      1_555  N
  C2        H3                 2.03(4)  .      2_555  N
  C2        H4                 2.03(9)  .      1_555  N
  C2        H4                 2.03(9)  .      2_555  N
  C2        H5               0.960(30)  .      1_555  N
  C2        H6                0.96(11)  .      1_555  N
  H1        N                0.900(28)  .      1_555  N
  H1        C1               1.982(30)  .      1_555  N
  H1        H2              1.45661(6)  .      1_555  N
  H2        N                 0.90(10)  .      1_555  N
  H2        C1                 1.98(8)  .      1_555  N
  H2        H1              1.45661(6)  .      1_555  N
  H3        N                2.003(31)  .      1_555  N
  H3        C1               0.960(19)  .      1_555  N
  H3        C2                 2.03(4)  .      1_555  N
  H3        H4              1.54364(6)  .      1_555  N
  H4        N                  2.00(8)  .      1_555  N
  H4        C1                0.96(10)  .      1_555  N
  H4        C2                 2.03(9)  .      1_555  N
  H4        H3              1.54364(6)  .      1_555  N
  H5        C1                 2.04(4)  .      1_555  N
  H5        C1                 2.04(4)  .      2_555  N
  H5        C2               0.960(30)  .      1_555  N
  H5        H6              1.55033(7)  .      1_555  N
  H6        C1                 2.04(8)  .      1_555  N
  H6        C1                 2.04(8)  .      2_555  N
  H6        C2                0.96(11)  .      1_555  N
  H6        H5              1.55033(7)  .      1_555  N

loop_
      _geom_angle_atom_site_label_1
      _geom_angle_atom_site_label_2
      _geom_angle_atom_site_label_3
      _geom_angle
      _geom_angle_site_symmetry_1
      _geom_angle_site_symmetry_2
      _geom_angle_site_symmetry_3
      _geom_angle_publ_flag
  SE        CD        SE              113.25(13)      1_555  .      3_555  N
  SE        CD        SE              116.91(12)      1_555  .    104_555  N
  SE        CD        N                 100.6(6)      1_555  .      1_555  N
  SE        CD        SE              116.44(12)      3_555  .    104_555  N
  SE        CD        N                  97.9(6)      3_555  .      1_555  N
  SE        CD        N                 108.3(6)    104_555  .      1_555  N
  CD        SE        CD               96.82(11)      1_555  .      3_554  N
  CD        SE        CD              100.01(12)      1_555  .    104_554  N
  CD        SE        CD               93.14(11)      3_554  .    104_554  N
  CD        N         C1               110.9(15)      1_555  .      1_555  N
  CD        N         H1                  109(4)      1_555  .      1_555  N
  CD        N         H2               109.5(17)      1_555  .      1_555  N
  C1        N         H1               109.5(34)      1_555  .      1_555  N
  C1        N         H2               109.5(20)      1_555  .      1_555  N
  H1        N         H2                  108(8)      1_555  .      1_555  N
  N         C1        C2               118.9(21)      1_555  .      1_555  N
  N         C1        H3               107.6(30)      1_555  .      1_555  N
  N         C1        H4               107.6(21)      1_555  .      1_555  N
  C2        C1        H3                  108(4)      1_555  .      1_555  N
  C2        C1        H4               107.6(20)      1_555  .      1_555  N
  H3        C1        H4                  107(8)      1_555  .      1_555  N
  C1        C2        C1               113.5(27)      1_555  .      2_555  N
  C1        C2        H5                  109(4)      1_555  .      1_555  N
  C1        C2        H6               108.9(19)      1_555  .      1_555  N
  C1        C2        H5                  109(4)      2_555  .      1_555  N
  C1        C2        H6               108.9(19)      2_555  .      1_555  N
  H5        C2        H6                  108(9)      1_555  .      1_555  N
  N         H1        H2                   36(7)      1_555  .      1_555  N
  N         H2        H1                36.0(17)      1_555  .      1_555  N
  C1        H3        H4                   36(6)      1_555  .      1_555  N
  C1        H4        H3                36.5(19)      1_555  .      1_555  N
  C2        H5        H6                   36(7)      1_555  .      1_555  N
  C2        H6        H5                36.1(23)      1_555  .      1_555  N

loop_ _atom_type_symbol
      _atom_type_number_in_cell
      _atom_type_scat_dispersion_real
      _atom_type_scat_dispersion_imag
      _atom_type_scat_Cromer_Mann_a1
      _atom_type_scat_Cromer_Mann_a2
      _atom_type_scat_Cromer_Mann_a3
      _atom_type_scat_Cromer_Mann_a4
      _atom_type_scat_Cromer_Mann_b1
      _atom_type_scat_Cromer_Mann_b2
      _atom_type_scat_Cromer_Mann_b3
      _atom_type_scat_Cromer_Mann_b4
      _atom_type_scat_Cromer_Mann_c
      _atom_type_scat_source
  CD         8.0   -0.079    4.653
 19.2214 0.59460 17.6444 6.90890 4.46100 24.7008 1.60290 87.4825 5.06940 
  International_Tables_Vol_C
  SE         8.0   -0.879    1.139
 17.0006 2.40980 5.81960 0.27260 3.97310 15.2372 4.35430 43.8163 2.84090 
  International_Tables_Vol_C
  N          8.0    0.029    0.018
 12.2126 0.00570 3.13220 9.89330 2.01250 28.9975 1.16630 0.58260 -11.529 
  International_Tables_Vol_C
  C         12.0    0.017    0.009
 2.31000 20.8439 1.02000 10.2075 1.58860 0.56870 0.86500 51.6512 0.21560 
  International_Tables_Vol_C
  H         40.0    0.000    0.000
 0.49300 10.5109 0.32291 26.1257 0.14019 3.14236 0.04081 57.7997 0.00304 
  International_Tables_Vol_C
_diffrn_radiation_probe                x-ray
_diffrn_radiation_polarisn_ratio       0.5

loop_
      _diffrn_radiation_wavelength
      _diffrn_radiation_wavelength_wt
      _diffrn_radiation_type
      _diffrn_radiation_wavelength_id
                      1.540500      1.000   K\a~1~  1
                      1.544300      0.500   K\a~2~  2
_pd_proc_ls_prof_R_factor              0.0650
_pd_proc_ls_prof_wR_factor             0.0862
_pd_proc_ls_prof_wR_expected           0.0695
_refine_ls_R_Fsqd_factor               0.07153

_pd_proc_ls_background_function
;   GSAS Background function number 2 with  8 terms.
 Cosine Fourier series
      1:   0.986166     2:    246.139     3:   -493.890     4:    730.546    
      5:   -716.941     6:    538.649     7:   -270.341     8:    93.9079    
;

_exptl_absorpt_process_details
;   GSAS Absorption/surface roughness correction: function number 0
 No correction is applied.
;
_exptl_absorpt_correction_T_min        1.00000
_exptl_absorpt_correction_T_max        1.00000
# Extinction correction
_gsas_exptl_extinct_corr_T_min         1.00000
_gsas_exptl_extinct_corr_T_max         1.00000
_pd_proc_ls_pref_orient_corr
;   Spherical Harmonic ODF
 Spherical harmonic order= 16
 The sample symmetry is: cylindrical (fiber texture)
 Index =  2  0  0   Coeff=    0.2705
 Index =  2  0  2   Coeff=   -0.5548
 Index =  4  0  0   Coeff=    0.1988
 Index =  4  0  2   Coeff=   -0.1217
 Index =  4  0  4   Coeff=    0.0597
 Index =  6  0  0   Coeff=   -0.0872
 Index =  6  0  2   Coeff=    0.0468
 Index =  6  0  4   Coeff=    0.0503
 Index =  6  0  6   Coeff=   -0.0977
 Index =  8  0  0   Coeff=    0.0779
 Index =  8  0  2   Coeff=    0.0258
 Index =  8  0  4   Coeff=   -0.0008
 Index =  8  0  6   Coeff=   -0.0742
 Index =  8  0  8   Coeff=   -0.2303
 Index = 10  0  0   Coeff=    0.2007
 Index = 10  0  2   Coeff=    0.2021
 Index = 10  0  4   Coeff=    0.0241
 Index = 10  0  6   Coeff=    0.1490
 Index = 10  0  8   Coeff=    0.0174
 Index = 10  0 10   Coeff=    0.0983
 Index = 12  0  0   Coeff=    0.0564
 Index = 12  0  2   Coeff=   -0.5338
 Index = 12  0  4   Coeff=    0.2140
 Index = 12  0  6   Coeff=    0.1700
 Index = 12  0  8   Coeff=   -0.0584
 Index = 12  0 10   Coeff=   -0.0988
 Index = 12  0 12   Coeff=   -0.0178
 Index = 14  0  0   Coeff=    0.2913
 Index = 14  0  2   Coeff=    0.2084
 Index = 14  0  4   Coeff=   -0.0476
 Index = 14  0  6   Coeff=   -0.0883
 Index = 14  0  8   Coeff=    0.1085
 Index = 14  0 10   Coeff=    0.2968
 Index = 14  0 12   Coeff=    0.1339
 Index = 14  0 14   Coeff=   -0.0177
 Index = 16  0  0   Coeff=   -0.1770
 Index = 16  0  2   Coeff=   -0.6563
 Index = 16  0  4   Coeff=    0.0347
 Index = 16  0  6   Coeff=   -0.3708
 Index = 16  0  8   Coeff=    0.1212
 Index = 16  0 10   Coeff=   -0.1438
 Index = 16  0 12   Coeff=    0.2857
 Index = 16  0 14   Coeff=   -0.5549
 Index = 16  0 16   Coeff=   -0.0179
 Prefered orientation correction range: Min=   0.72859, Max=   1.50732
;

_pd_proc_ls_profile_function
;
 CW Profile function number 2 with  18 terms
 Profile coefficients for Simpson's rule integration of pseudovoigt function
 C.J. Howard (1982). J. Appl. Cryst.,15,615-620.
 P. Thompson, D.E. Cox & J.B. Hastings (1987). J. Appl. Cryst.,20,79-83.
 #1(GU)   =    2.000 #2(GV)   =   -2.000 #3(GW)   =    5.000
 #4(LX)   =    5.757 #5(LY)   =   21.480 #6(trns) =    2.050
 #7(asym) =   6.2391 #8(shft) =  -2.1774 #9(GP)   =    0.000
 #10(stec)=     0.83 #11(ptec)=    -1.13 #12(sfec)=     0.00
 #13(L11) =    0.000 #14(L22) =    0.000 #15(L33) =    0.000
 #16(L12) =    0.000 #17(L13) =    0.000 #18(L23) =    0.000
 Peak tails are ignored  where the intensity is below 0.0050 times the peak
   Aniso. broadening axis   0.0   0.0   1.0
;
_pd_proc_ls_peak_cutoff 0.00500
_pd_proc_info_datetime                 2002-11-14T01:51:10
_pd_calc_method                        "Rietveld Refinement"

_pd_meas_2theta_range_min              5.0
_pd_meas_2theta_range_max              99.99
_pd_meas_2theta_range_inc              0.01
_pd_proc_2theta_range_min              5.0
_pd_proc_2theta_range_max              99.99
_pd_proc_2theta_range_inc              0.01

_pd_meas_number_of_points              9500
_pd_proc_number_of_points              9500

_reflns_number_observed                568
_reflns_limit_h_min                    0
_reflns_limit_h_max                    20
_reflns_limit_k_min                    0
_reflns_limit_k_max                    6
_reflns_limit_l_min                    0
_reflns_limit_l_max                    6
_reflns_d_resolution_high              1.009
_reflns_d_resolution_low               6.536
#===The End
